# Supplementary material for: Evaluation of Serum Leucine-Rich Alpha-2 Glycoprotein as a New Inflammatory Biomarker of Inflammatory Bowel Disease
Source: PubMed Central journal article supplement (PMC7874844; doi:10.1155/2021/8825374), 2021-02-01

# Figure S1

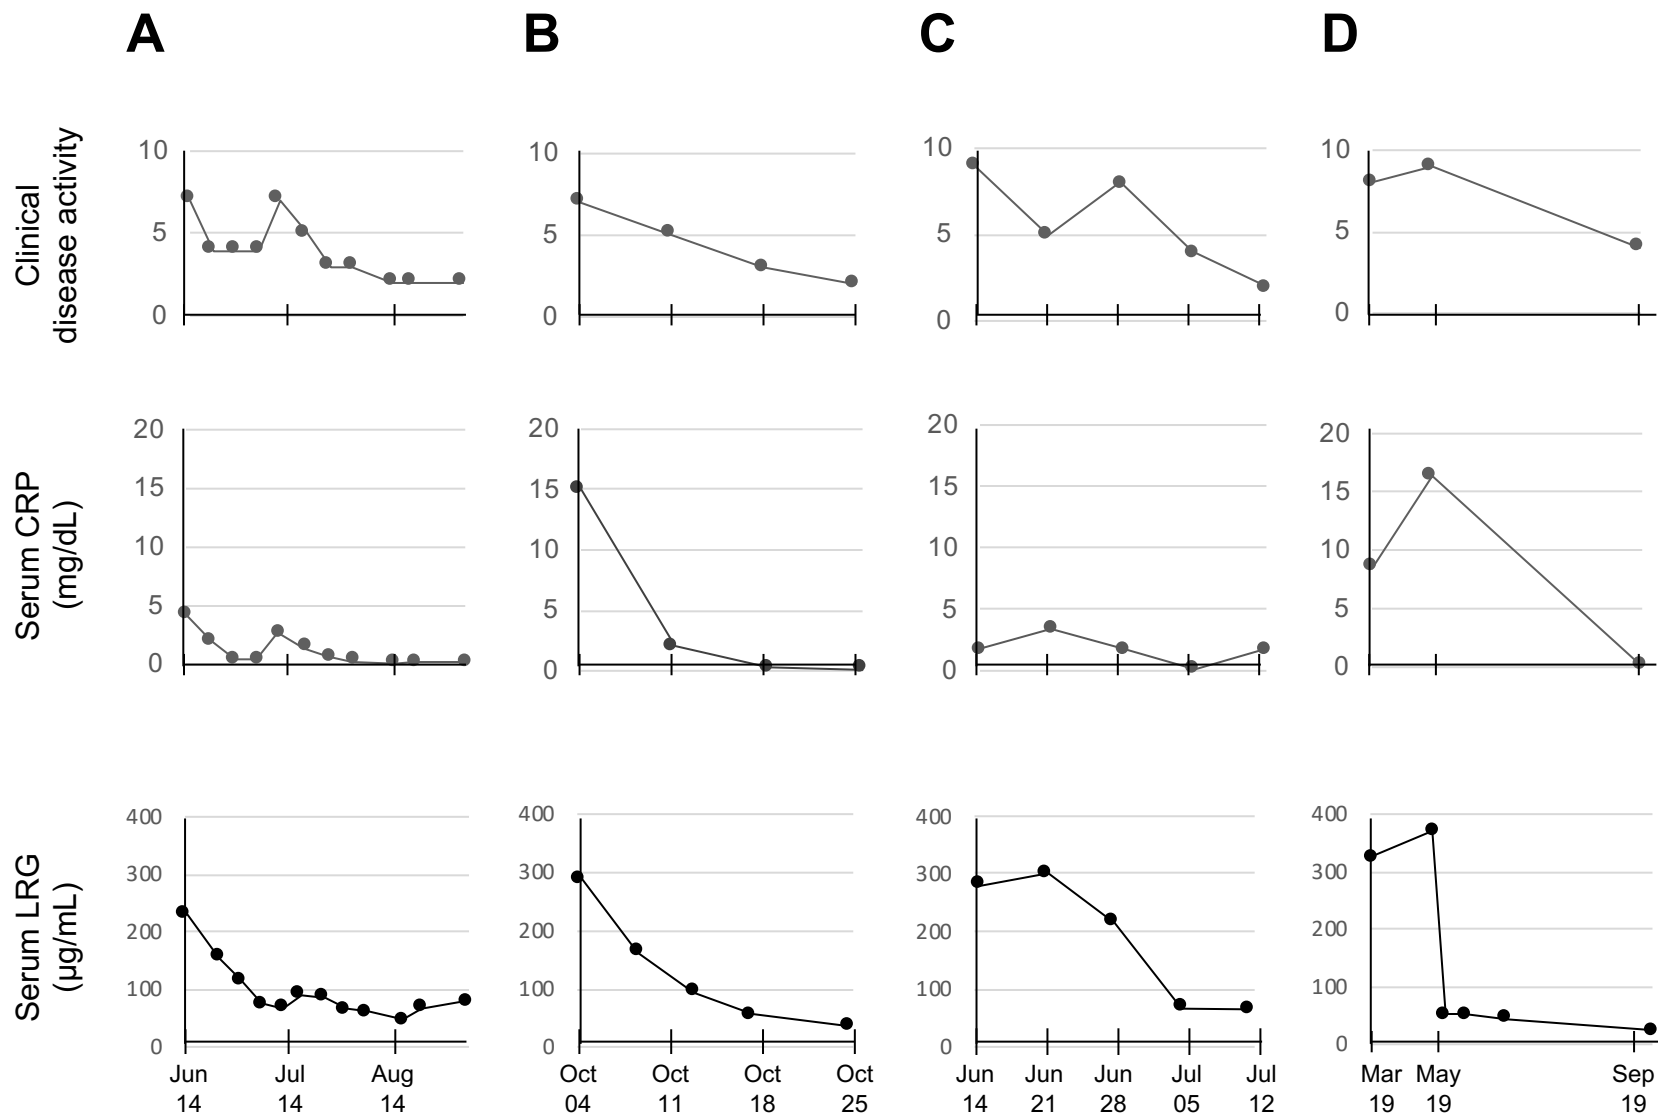

Supplement: 8825374.f1.pdf [file 8825374.f1.pdf]
